# Supplementary material for: The plasma protein fibrinogen stabilizes clusters of red blood cells in microcapillary flows
Source: PubMed Central journal article supplement — Sci Rep. 2014 Mar 11;4:4348. doi: 10.1038/srep04348 (PMC3949293; doi:10.1038/srep04348), 2014-03-11
Supplement: srep04348-s1.pdf [file srep04348-s1.pdf]

# **The plasma protein fibrinogen stabilizes clusters of red blood cells in microcapillary flows**

M. Brust<sup>1,2\*</sup>, O. Aouane<sup>1,2,7\*</sup>, M. Thiébaud<sup>2\*</sup>, D. Flormann<sup>1</sup>, C. Verdier<sup>2</sup>, L. Kaestner<sup>3</sup>, M. W. Laschke<sup>4</sup>, H. Selmi<sup>5,6</sup>, A. Benyoussef<sup>7</sup>, T. Podgorski<sup>2</sup>, G. Coupier<sup>2</sup>, C. Misbah<sup>2</sup>, C. Wagner<sup>1</sup>

1 Experimental Physics, Saarland University, 66123 Saarbrücken, Germany

2 Laboratoire Interdisciplinaire de Physique, CNRS - UMR 5588, Université Grenoble I, B.P. 87, 38402 Saint Martin d'Hères Cedex, France

3 Institute for Molecular Cell Biology and Research Centre for Molecular Imaging and Screening, School of Medicine, Saarland University, Building 61, 66421 Homburg/Saar, Germany

4 Institute for Clinical & Experimental Surgery, Saarland University, 66421 Homburg/Saar, Germany

5 Laboratoire d'Ingénierie Mathématique, Ecole Polytechnique de Tunisie B.P. 743 - 2078 La Marsa, Tunisia

6 Riyadh College of Technology, Technical and Vocational Training Corporation, Riyadh 12433, Saudi Arabia

7 LMPHE, URAC 12, Faculté des Sciences, Université Mohammed V- Agdal, Rabat, Morocco

\*These authors contributed equally to this work

## **Supplementary Information**

The supplementary file two contains an intravital fluorescence microscopy video from the circulating red blood cells (RBCs)

The file name is "movie.avi"

The experimental method for the video is described in the supplementary information with the full methods, section "imaging RBCs in vivo". The video shows several microcapillaries with red blood cells passing single or in clusters. The light part is the plasma that was labeled with fluorescein-isothiocyanate (FITC)-labeled dextran, the moving dark spots are the RBCs.
